# Supplementary material for: Knockout of toll-like receptor impairs nerve regeneration after a crush injury
Source: PubMed Central journal article supplement (PMC5655236; doi:10.18632/oncotarget.20206), 2017-08-10
Supplement: oncotarget-08-80741-s001.pdf [file oncotarget-08-80741-s001.pdf]

# Knockout of toll-like receptor impairs nerve regeneration after a crush injury

## SUPPLEMENTARY MATERIALS

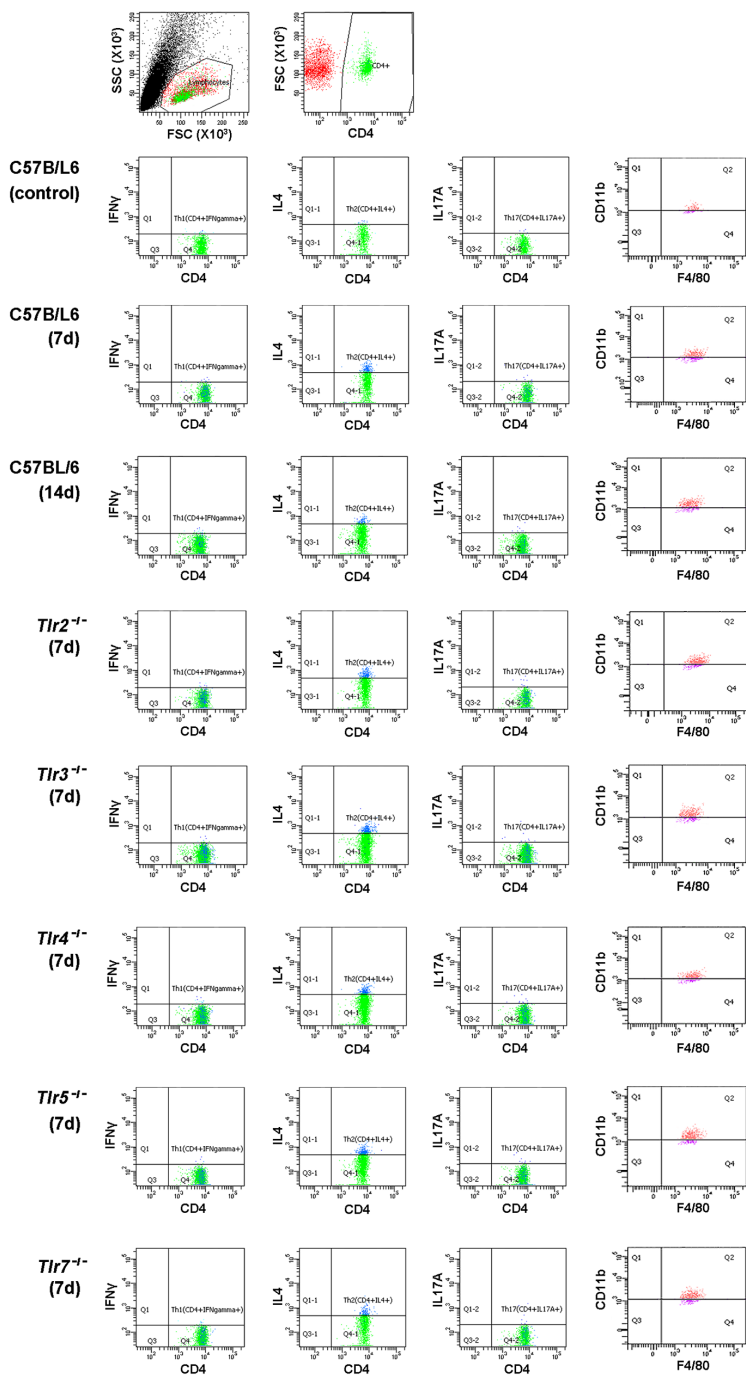

Supplementary Figure 1: Flow cytometry analysis of immunoreactive T cells and macrophages in triplicate of the distal nerve segment after a crush injury.

**Supplementary Table 1: Gene table of Mouse Neurogenesis RT<sup>2</sup> Profiler™ PCR Array.**

**See Supplementary File 1**
